# Supplementary material
Source: MDPI journal article supplement (https://www.mdpi.com/2071-1050/12/11/4405)
Supplement: s1 [file s1]

Table S1. Reviewed studies.

| References                             | Field Background                 | Main Theories and Methodologies that Guide the Paper        | Walkable Factors (Efficiency and Comfort, Pleasantness, Safety, Attractiveness)                                                                                                                                                                                                                                                                                                                                                       | Type of Data: M; EJ; HS | Data and Covariables                      | Sample Social Group Profile scale             | Validation |
|----------------------------------------|----------------------------------|-------------------------------------------------------------|---------------------------------------------------------------------------------------------------------------------------------------------------------------------------------------------------------------------------------------------------------------------------------------------------------------------------------------------------------------------------------------------------------------------------------------|-------------------------|-------------------------------------------|-----------------------------------------------|------------|
| Bader et al. (2015) [80]               | Urban planning and Public health | Influence of urban form on people behaviour                 | <p><b>Attractiveness:</b> number and type of land uses;</p> <p><b>Efficiency and comfort:</b> sidewalk width; street design;</p> <p><b>Safety and security:</b> mix of use; transparency and permeability of built environment; geometry of crossings and facilities for pedestrians at crossings;</p> <p><b>Pleasantness:</b> aesthetic of place; architectural and landscape design</p>                                             | <i>M; EJ</i>            | Audit on line                             | US metropolitan areas; census tract level     | RB         |
| Oswald Beiler and Phillips (2016) [82] | Urban planning and public health | Influence of urban form on health, social capital           | <p><b>Attractiveness:</b> mix of use;</p> <p><b>Efficiency and comfort:</b> cost; sidewalk width; connectivity; continuity; barriers; design of the street; slope; pavement conditions;</p> <p><b>Safety and security:</b> mix of use; lighting; car traffic volume, design speed of the route; crossing facilities;</p> <p><b>Pleasantness:</b> aesthetic of place; shelter and shade; sedibility; transparency and permeability</p> | <i>M</i>                | GIS data and manual field data collection | Union County four type of paths; street level | EX         |
| Bias et al. (2010) [99]                | Urban planning and public health | Relation between physical environment and physical activity | <p><b>Attractiveness:</b> mix of use;</p> <p><b>Efficiency and comfort:</b> costs, hilliness, street connectivity,</p> <p><b>Pleasantness:</b> aesthetics;</p>                                                                                                                                                                                                                                                                        | <i>EJ</i>               | Telephone survey                          | Morgantown and Cabell County, West Virginia   | SP; RB     |

| References                  | Field Background             | Main Theories and Methodologies that Guide the Paper      | Walkable Factors (Efficiency and Comfort, Pleasantness, Safety, Attractiveness)                                                                                                                                                                                                                                                                                                                                                      | Type of Data: M; EJ; HS | Data and Covariables                                                                         | Sample Social Group Profile scale                                       | Validation |
|-----------------------------|------------------------------|-----------------------------------------------------------|--------------------------------------------------------------------------------------------------------------------------------------------------------------------------------------------------------------------------------------------------------------------------------------------------------------------------------------------------------------------------------------------------------------------------------------|-------------------------|----------------------------------------------------------------------------------------------|-------------------------------------------------------------------------|------------|
|                             |                              |                                                           | <b>Safety and security:</b> speed of vehicular traffic, availability of sidewalks and crosswalks; presence of people                                                                                                                                                                                                                                                                                                                 |                         |                                                                                              | 40-65 years old residents;                                              |            |
| Blečić et al. (2015) [10]   | Urban and transport planning | Operational measure of urban walkability                  | <b>Efficiency and comfort:</b> cost distance and slope, street type, bicycle track, footway width and maintenance, shelter and shade, benches;<br><b>Attractiveness:</b> presence, typology and intensity of activities; building density;<br><b>Safety and Security:</b> street lighting, on street parking, integration of the street with the surrounding;<br><b>Pleasantness:</b> scenery; environmental/architectural interest; | <i>M</i>                | OSM dataset; built environment data collected with on field audit and computer aided methods | City of Alghero, Italy, street segment level and points of urban fabric | -          |
| Boulangé et al. (2018) [22] | Urban and transport Planning | Influence of urban form on walking                        | <b>Efficiency and comfort:</b> street connectivity; intersection density; distance to closest public transport stop/train station/supermarket; land use mix, dwelling density;<br><b>Attractiveness:</b> local living destinations; housing diversity                                                                                                                                                                                | <i>M; EJ</i>            | Travel survey and participatory workshop<br>Official GIS, layers, census                     | Broadmeadows suburb, Melbourne, neighbourhood level                     | SP         |
| Buck et al. (2011) [39]     | Public health                | Influence of urban form on physical activity for children | <b>Efficiency and comfort:</b> intersections density, urban form, sidewalk and transit station presence;                                                                                                                                                                                                                                                                                                                             | <i>M</i>                | GIS data, municipal geospatial                                                               | Delmenhorst Germany; 596 Children (2-10 years old);                     | -          |

| References                | Field Background                          | Main Theories and Methodologies that Guide the Paper                           | Walkable Factors (Efficiency and Comfort, Pleasantness, Safety, Attractiveness)                                                                                                                                                                                                                                                                                                             | Type of Data: M; EJ; HS | Data and Covariables                                                                  | Sample Social Group Profile scale                        | Validation |
|---------------------------|-------------------------------------------|--------------------------------------------------------------------------------|---------------------------------------------------------------------------------------------------------------------------------------------------------------------------------------------------------------------------------------------------------------------------------------------------------------------------------------------------------------------------------------------|-------------------------|---------------------------------------------------------------------------------------|----------------------------------------------------------|------------|
|                           |                                           |                                                                                | <b>Attractiveness:</b> presence of public facilities                                                                                                                                                                                                                                                                                                                                        |                         | information system; demos; economic data                                              | block level                                              |            |
| Carr, et al. (2010) [93]  | Urban planning                            | Operational measure of urban walkability                                       | <b>Attractiveness:</b> presence and density of activities;<br><b>Efficiency and comfort:</b> street connectivity, street density, average block length;                                                                                                                                                                                                                                     | <i>M</i>                | Census; GIS dataset (Tiger); street network Internet-based reference service database | 296 participants, Rhode Island, USA, block level         | EX         |
| Cerin et al. (2006) [100] | Transportation planning and public health | Relationship between urban form and walkability and cyclability for recreation | <b>Efficiency and comfort:</b> shelters and shade; cost; design of the street; design of the street (connectivity), signalization;<br><b>Pleasantness:</b> scenery; architectural and urban design; cleanliness/pollution;<br><b>Safety and security:</b> separation features; lighting; volume/crowding if cars in the street; design of the street; crime/policy presence; urban texture; | <i>M; EJ</i>            | Neighbourhood surveys and GIS database; socioeconomic status                          | King County; 16 neighbourhoods 1286 adults; census block | RB         |

| References                        | Field Background                 | Main Theories and Methodologies that Guide the Paper                 | Walkable Factors (Efficiency and Comfort, Pleasantness, Safety, Attractiveness)                                                                                                                                                                                                                                                                                                                                                  | Type of Data: M; EJ; HS | Data and Covariables                            | Sample Social Group Profile scale                                     | Validation |
|-----------------------------------|----------------------------------|----------------------------------------------------------------------|----------------------------------------------------------------------------------------------------------------------------------------------------------------------------------------------------------------------------------------------------------------------------------------------------------------------------------------------------------------------------------------------------------------------------------|-------------------------|-------------------------------------------------|-----------------------------------------------------------------------|------------|
|                                   |                                  |                                                                      | <p><b>Attractiveness:</b> presence, density; typology; mix of activities and opportunities;</p>                                                                                                                                                                                                                                                                                                                                  |                         |                                                 |                                                                       |            |
| Cervero and Duncan (2003) [1]     | Urban planning and public health | Influence of urban form on physical activity (walking and bicycling) | <p><b>Efficiency and comfort:</b> cost distance and slope; street connectivity; block size; walking and cycling facilities;</p> <p><b>Attractiveness:</b> presence; typology density and intensity of activities;</p> <p><b>Safety and Security:</b> low income %, street lighting/darkness</p>                                                                                                                                  | M                       | Census, travel survey, geodatabase and GIS data | San Francisco Bay area, households; block scale                       | RB         |
| Cervero and Kockelman (1997) [63] | Urban planning                   | Relationship between built environment and travel demand             | <p><b>Efficiency and comfort:</b> block length, street patterns, proportion of intersections, street connectivity, sidewalk width, slope, street trees;</p> <p><b>Safety and security:</b> pedestrian and cycling provisions, distance between overhead street lights, signalized intersections, overhead street lights;</p> <p><b>Attractiveness:</b> population and employment density, commercial intensity, land use mix</p> | M;EJ                    | Travel data, census, land use data field survey | 50 neighbourhood s in the San Francisco Bay Area; census tracts level | RB         |
| Clifton et al. (2007) [2]         | Urban planning                   | Relationship between physical environment and walking behaviour      | <p><b>Efficiency and comfort:</b> design of the street; pavement type and conditions; obstructions; continuity of the route; connectivity; cost; off parking facilities; signalization, information availability and signage;</p>                                                                                                                                                                                                | M                       | Audit data                                      | College Park and Montgomery County; 3635 segments                     | -          |

| References               | Field Background             | Main Theories and Methodologies that Guide the Paper                   | Walkable Factors (Efficiency and Comfort, Pleasantness, Safety, Attractiveness)                                                                                                                                                                                                                                                                                      | Type of Data: M; EJ; HS | Data and Covariables                                                                                              | Sample Social Group Profile scale                                                                      | Validation |
|--------------------------|------------------------------|------------------------------------------------------------------------|----------------------------------------------------------------------------------------------------------------------------------------------------------------------------------------------------------------------------------------------------------------------------------------------------------------------------------------------------------------------|-------------------------|-------------------------------------------------------------------------------------------------------------------|--------------------------------------------------------------------------------------------------------|------------|
|                          |                              |                                                                        | <p><b>Pleasantness:</b> architectural and urban design, cleanliness/pollution; bicycle lanes, urban texture, shelters and shade;</p> <p><b>Safety and security:</b> lighting; separation features; pavement type and conditions; design speed of the route; on street parking facilities;</p> <p><b>Attractiveness:</b> presence, number of activities, typology</p> |                         |                                                                                                                   | of a pedestrian network or pathways; street level                                                      |            |
| Colclough (2009) [101]   | Urban and transport planning | Relationship between physical environment and pedestrian accessibility | <p><b>Efficiency and comfort:</b> cost, distance, path gradient, block size intersections, street connectivity;</p> <p><b>Attractiveness:</b> dwelling, density, percentage</p>                                                                                                                                                                                      | <i>M;EJ</i>             | OS Integrated Transport Network (ITN), GIS datasets by official sources, digital height data, field audit, survey | West Northamptonshire (UK); 2km catchment area level                                                   | EX; SP     |
| Emery et al. (2003) [84] | Public health                | Influence of urban form on physical activity                           | <p><b>Efficiency and comfort:</b> continuity of the route;</p> <p><b>Safety and Security:</b> Volume of cars on the street; design of the street; pavement conditions; design speed of the route; separation features; lighting</p>                                                                                                                                  | <i>M</i>                | Audit and survey data                                                                                             | the University of North Carolina at Chapel Hill; 31 urban and rural road segments identified within 10 | EX         |

| References                    | Field Background                  | Main Theories and Methodologies that Guide the Paper            | Walkable Factors (Efficiency and Comfort, Pleasantness, Safety, Attractiveness)                                                                                                                                                                                                                                                                                                 | Type of Data: M; EJ; HS | Data and Covariables                                                                    | Sample Social Group Profile scale                                              | Validation |
|-------------------------------|-----------------------------------|-----------------------------------------------------------------|---------------------------------------------------------------------------------------------------------------------------------------------------------------------------------------------------------------------------------------------------------------------------------------------------------------------------------------------------------------------------------|-------------------------|-----------------------------------------------------------------------------------------|--------------------------------------------------------------------------------|------------|
|                               |                                   |                                                                 |                                                                                                                                                                                                                                                                                                                                                                                 |                         |                                                                                         | miles of the campus; street level                                              |            |
| Ewing and Cervero (2010) [28] | Urban and transportation planning | Relationship between physical environment and walking behaviour | <p><b>Efficiency and comfort:</b> cost and distance to destinations (stores, transit stop, etc.) intersection/street density;</p> <p><b>Attractiveness:</b> population and job density jobs-housing balance land use mix (entropy index)</p>                                                                                                                                    | M                       | Data from individual primary studies                                                    | -                                                                              | RB         |
| Ewing and Handy (2009) [12]   | Urban planning                    | Relationship between urban form and walkability                 | <p><b>Efficiency and comfort:</b> directness of route; sedibility;</p> <p><b>Pleasantness:</b> volume/crowding of pedestrians on the street; architectural and urban design; noise level; scenery; landscape design; urban texture;</p> <p><b>Security:</b> activities' atmosphere;</p> <p><b>Attractiveness:</b> presence, density of active uses; typology indoor/outdoor</p> | M                       | Survey data                                                                             | New York; 48 video-clips in commercial streets; street level                   | EX         |
| Forsyth et al. (2008) [30]    | Urban and transportation planning | Relationship between physical environment and walking behaviour | <p><b>Efficiency and Comfort:</b> street pattern (road and block length, intersection density, ...), pedestrian-oriented infrastructure (sidewalk length, street trees, traffic calming measures, transit stop density, ..);</p> <p><b>Attractiveness:</b> amenities and mixed use density, entropy index</p>                                                                   | M; EJ                   | GIS datasets; survey, seven day travel diary accelerometer, computer mapping and survey | 715 participants in the Twin Cities, Minnesota; street and neighbourhood level | -          |

| References                          | Field Background                  | Main Theories and Methodologies that Guide the Paper            | Walkable Factors (Efficiency and Comfort, Pleasantness, Safety, Attractiveness)                                                                                                                                                                             | Type of Data: M; EJ; HS | Data and Covariables                                                               | Sample Social Group Profile scale                                                                    | Validation |
|-------------------------------------|-----------------------------------|-----------------------------------------------------------------|-------------------------------------------------------------------------------------------------------------------------------------------------------------------------------------------------------------------------------------------------------------|-------------------------|------------------------------------------------------------------------------------|------------------------------------------------------------------------------------------------------|------------|
| Frank et al. (2006 [4]; (2010) [56] | Urban planning                    | Influence of urban form on physical activity                    | <b>Efficiency and comfort:</b> cost; easy of walk; design of the street (connectivity); cost (frequency of walking);<br><b>Attractiveness:</b> presence, density of active uses; mix and typology of activities                                             | M                       | NQoL data; statistical data; survey; demos,                                        | City of Baltimore; adults; Block level                                                               | RB         |
| Ghani, et al 2013 [85]              | Urban and transportation planning | Influence of urban form on travel behaviour                     | <b>Efficiency and comfort:</b> design of the street (sidewalk presence and continuity), distance, <b>Safety and security:</b> pavement; lighting; separation; signals; traffic calming<br><b>Attractiveness:</b> presence and proximity of active land uses | M                       | Field survey on a set of roads of different hierarchy                              | Taman Bukit Indah, Johor Bahru, Malaysia; neighbourhood and street level                             |            |
| Giles-Corti et al. (2014) [90]      | Urban and transportation planning | Influence of urban form on travel behaviour                     | <b>Efficiency:</b> street connectivity,<br><b>Attractiveness:</b> residential or dwelling density and land use mix.                                                                                                                                         | M                       | Australian state government datasets: cadastre, dwellings, street networks, census | North West Region of Melbourne, Australia; neighbourhood level, walkable service area level (15 min) | EX         |
| Glazier et al. (2013) [31]          | Public health                     | Relationship between physical environment and walking behaviour | <b>Efficiency and comfort:</b> cost; street connectivity;<br><b>Attractiveness:</b> presence, density and mix land use;                                                                                                                                     | M                       | Statistical data Demos                                                             | City of Toronto, 248 million people census tracts and block level                                    | RB         |

| References                   | Field Background                           | Main Theories and Methodologies that Guide the Paper                                               | Walkable Factors (Efficiency and Comfort, Pleasantness, Safety, Attractiveness)                                                                                                                                                                                                       | Type of Data: M; EJ; HS | Data and Covariables                                                               | Sample Social Group Profile scale                                 | Validation |
|------------------------------|--------------------------------------------|----------------------------------------------------------------------------------------------------|---------------------------------------------------------------------------------------------------------------------------------------------------------------------------------------------------------------------------------------------------------------------------------------|-------------------------|------------------------------------------------------------------------------------|-------------------------------------------------------------------|------------|
|                              |                                            |                                                                                                    | Security: urban texture;                                                                                                                                                                                                                                                              |                         |                                                                                    |                                                                   |            |
| Hajna et al. (2013) [32]     | Public health                              | Relationship between physical environment and walking behaviour                                    | <b>Efficiency and comfort:</b> design of the street (connectivity; sidewalk presence); continuity of the route; cost;<br><b>Safety and security:</b> pavement; lighting; feel safe;<br><b>Pleasantness:</b> urban texture;<br><b>Attractiveness:</b> presence, density of active uses | <i>M; EJ</i>            | Statistical data; Audit data                                                       | Montreal; adults with diabetes; street level                      | EX         |
| Tal and Handy (2011) [95 ]   | Integrated land use and transport planning | Relationship between urban form and pedestrian connectivity and accessibility                      | <b>Efficiency and comfort:</b> distance, directness, connectivity;<br><b>Attractiveness:</b> density and variety of amenities                                                                                                                                                         | <i>M</i>                | GIS datasets, pedestrian network, demos                                            | City of Davis, USA suburban areas; neighbourhood and street level | EX; RB     |
| Iacono et al. (2010) [33]    | Urban and transportation planning          | Relationship between physical environment and non motorized travel (walking and cycling) behaviour | <b>Efficiency and comfort:</b> impedance distance and time, pedestrian and bicycling facilities;<br><b>Attractiveness:</b> presence, number, type, dimension of land-use                                                                                                              | <i>M; EJ</i>            | Household travel survey data; Establishment-level data; parcel-level land use data | 1600 block groups in South Minneapolis; block level               | RB         |
| Keyvanfar et al. (2018) [60] | Integrated land use and transport planning | Relationship between physical environment and pedestrian behaviour                                 | <b>Efficiency and comfort:</b> width of walking zones, sidewalks networking; street furniture, trees, shelters, street lighting, type of sidewalk pavement, steepness, obstacles/nuisance;                                                                                            | <i>EJ</i>               | self-report questionnaire to capture pedestrian's DTM for walking                  | Taman University neighbourhood, Skudai city, Malaysia;            | SP         |



| References                  | Field Background | Main Theories and Methodologies that Guide the Paper                                          | Walkable Factors (Efficiency and Comfort, Pleasantness, Safety, Attractiveness)                                                                                                                                                                                                                                                                                                                                                                                                                                                   | Type of Data: M; EJ; HS | Data and Covariables                                         | Sample Social Group Profile scale | Validation |
|-----------------------------|------------------|-----------------------------------------------------------------------------------------------|-----------------------------------------------------------------------------------------------------------------------------------------------------------------------------------------------------------------------------------------------------------------------------------------------------------------------------------------------------------------------------------------------------------------------------------------------------------------------------------------------------------------------------------|-------------------------|--------------------------------------------------------------|-----------------------------------|------------|
|                             |                  |                                                                                               | <p><b>Safety and security:</b> bike lanes, on-street parking, mid-block crossings, traffic signals, signage, traffic calming devices, medians, lighting, street surveillance, street-facing entrances, street-level façade transparency;</p> <p><b>Pleasantness:</b> enclosure, buffer zone;</p> <p><b>Attractiveness:</b> land use mix, diversity of buildings</p>                                                                                                                                                               |                         | towards 3 shopping centres.                                  | path and neighbourhood level      |            |
| Koohsari et al. (2013) [87] | Public health    | Relationship between urban form and walkability; Influence of urban form on physical activity | <p><b>Efficiency and comfort:</b> shelters and shade; cost; design of the street; design of the street (connectivity), signalization;</p> <p><b>Pleasantness:</b> scenery; architectural and urban design; cleanliness/pollution;</p> <p><b>Safety and security:</b> separation features; lighting; volume/crowding if cars in the street; design of the street; crime/policy presence;</p> <p><b>Attractiveness:</b> presence and number of active services and urban opportunities; presence, density, typology of services</p> | <i>M; EJ</i>            | Neighbourhood surveys (questionnaires); GIS databases; demos | Melbourne; 330 households 990     | RB         |
| Krizek (2003) [62]          | Urban planning   | Relationship between physical environment and neighbourhood accessibility                     | <b>Efficiency and comfort:</b> block size intersection density, street connectivity;                                                                                                                                                                                                                                                                                                                                                                                                                                              | <i>M</i>                | Census block-level data, GIS                                 | Central Puget                     | EX         |

| References                    | Field Background                  | Main Theories and Methodologies that Guide the Paper                                             | Walkable Factors (Efficiency and Comfort, Pleasantness, Safety, Attractiveness)                                                                                                                                      | Type of Data: M; EJ; HS | Data and Covariables                                                           | Sample Social Group Profile scale                               | Validation |
|-------------------------------|-----------------------------------|--------------------------------------------------------------------------------------------------|----------------------------------------------------------------------------------------------------------------------------------------------------------------------------------------------------------------------|-------------------------|--------------------------------------------------------------------------------|-----------------------------------------------------------------|------------|
|                               |                                   |                                                                                                  | <b>Attractiveness:</b> presence and density housing residents and employees, land use mix                                                                                                                            |                         | dataset (Tiger)                                                                | Sound metropolitan area, Washington; 150-meter grid cells level |            |
| Lee and Moudon (2006) [64]    | Urban planning                    | Relationship between physical environment and walking behaviour.                                 | <b>Efficiency and comfort:</b> cost, route directness;<br><b>Attractiveness:</b> number of services and urban opportunities; presence and density of active uses; type of services and activities; mix of activities | <i>M</i>                | Survey data, GIS data, demos                                                   | Seattle and suburban area; 608 adult; census block level        | RB         |
| Leslie et al. (2007) [102]    | Urban planning and public health  | Influence of urban form on physical activity                                                     | <b>Efficiency and comfort:</b> connectivity<br><b>Attractiveness:</b> density<br><b>Safety and security:</b> mixed use;                                                                                              | <i>M</i>                | Dwelling data, tax valuation and cadastral (parcel) data, PLACE data<br>Census | Adelaide, Australia; census tract level                         | RB         |
| Lwin and Murayama (2011) [92] | Urban planning                    | Relation between urban environment and walkability; influence of urban form on physical activity | <b>Efficiency and comfort:</b> cost and distance;<br><b>Pleasantness:</b> scenery;<br><b>Attractiveness:</b> number of activities; quality and building footprint                                                    | <i>M</i>                | Fine scale GIS data                                                            | Tsukuba, Japan; street level                                    | -          |
| Moura et al. (2017) [81]      | Urban and transportation planning | Relationship between physical environment and walking behaviour of                               | <b>Efficiency and Comfort:</b> path connectivity continuity and directness, convenience, land use diversity, sidewalk width, pavement                                                                                | <i>M; EJ</i>            | Neighbourhoods and street                                                      | 2 districts of Lisbon; neighbourhood and street level           | SP         |

| References                   | Field Background             | Main Theories and Methodologies that Guide the Paper            | Walkable Factors (Efficiency and Comfort, Pleasantness, Safety, Attractiveness)                                                                                                                                                                                                                                                                                           | Type of Data: M; EJ; HS | Data and Covariables                | Sample Social Group Profile scale                                                                              | Validation |
|------------------------------|------------------------------|-----------------------------------------------------------------|---------------------------------------------------------------------------------------------------------------------------------------------------------------------------------------------------------------------------------------------------------------------------------------------------------------------------------------------------------------------------|-------------------------|-------------------------------------|----------------------------------------------------------------------------------------------------------------|------------|
|                              |                              | different groups and trip purposes                              | quality; conspicuousness and visibility of landmarks and wayfinding; public space planning and design standards;<br><b>Safety and security:</b> coexistence between pedestrian and other modes, location of pedestrian crossings and traffic, vigilance effect and perception;<br><b>Attractiveness:</b> conviviality of meeting places and anchor places, street design; |                         | surveys; GIS databases              |                                                                                                                |            |
| Owen et al. (2007) [35]      | Public health                | Relationship between physical environment and walking behaviour | <b>Efficiency and comfort:</b> street connectivity, street intersection density, and proximity;<br><b>Attractiveness:</b> dwelling density, land-use mix, net retail area                                                                                                                                                                                                 | <i>M</i>                | Census data; GIS databases, survey; | Adelaide, Australia; 2650 adults recruited from 32 neighbourhoods with high or low walkability; district level | RB         |
| Peiravian et al. (2014) [36] | Urban and transport planning | Relationship between physical environment and walking behaviour | <b>Efficiency and comfort:</b> intersection density;<br><b>Attractiveness:</b> land-use diversity, commercial density, population density                                                                                                                                                                                                                                 | <i>M</i>                | Census, GIS data                    | City of Chicago; sub traffic zones level                                                                       | -          |

| References                 | Field Background | Main Theories and Methodologies that Guide the Paper            | Walkable Factors (Efficiency and Comfort, Pleasantness, Safety, Attractiveness)                                                                                                                                                                                                                                                                                                                                                                                                                                                                                               | Type of Data: M; EJ; HS | Data and Covariables                                                                                  | Sample Social Group Profile scale                                    | Validation |
|----------------------------|------------------|-----------------------------------------------------------------|-------------------------------------------------------------------------------------------------------------------------------------------------------------------------------------------------------------------------------------------------------------------------------------------------------------------------------------------------------------------------------------------------------------------------------------------------------------------------------------------------------------------------------------------------------------------------------|-------------------------|-------------------------------------------------------------------------------------------------------|----------------------------------------------------------------------|------------|
| Pikora et al. (2002) [67]  | Public health    | Relation between built environment and physical activity        | <p><b>Efficiency and comfort:</b> street permeability; intersections distance and design; walking surface; streets layout; sedibility; trees;</p> <p><b>Safety and security:</b> lighting; surveillance; traffic volume; on street parking; crossing characteristics; path/lane obstruction; social width;</p> <p><b>Attractiveness:</b> destinations presence; number and type of buildings;</p> <p><b>Pleasantness:</b> Aesthetic of streetscape; sky exposure; facade continuity; softness, visual complexity architecture; trees; maintenance; pollution; cleanliness</p> | <i>M; EJ</i>            | Data collected with audit; information from external sources (i.e. traffic authorities); GIS datasets | Perth Western Australia; street level                                | EX; SP     |
| Porta and Renne (2005) [7] | Urban planning   | Relationship between built environment and urban sustainability | <p><b>Efficiency and comfort:</b> cost; sedibility; design of the street;</p> <p><b>Attractiveness:</b> presence; typology;</p> <p><b>Pleasantness:</b> softness of spaces; scenery; site's atmosphere;</p> <p><b>Safety and security:</b> Urban texture; Presence of activities</p>                                                                                                                                                                                                                                                                                          | <i>M</i>                | Statistical data; survey data with photos                                                             | Fremantle and Joondalup, Perth, Australia; road survey; street level | -          |
| Rogers et al. (2011) [58]  | Urban planning   | Influence on urban form on social capital and walkability;      | <p><b>Efficiency and comfort:</b> frequency of walk; cost (distance, time);</p> <p><b>Pleasantness:</b> trusting;</p> <p><b>Security:</b> trusting</p>                                                                                                                                                                                                                                                                                                                                                                                                                        | <i>EJ</i>               | Neighbourhood audits, statistical data; demos;                                                        | Manchester and Portsmouth; census block                              | -          |

| References                      | Field Background             | Main Theories and Methodologies that Guide the Paper    | Walkable Factors (Efficiency and Comfort, Pleasantness, Safety, Attractiveness)                                                                                                                                                                                                                                                                          | Type of Data: M; EJ; HS | Data and Covariables                                                                                         | Sample Social Group Profile scale                                                                        | Validation |
|---------------------------------|------------------------------|---------------------------------------------------------|----------------------------------------------------------------------------------------------------------------------------------------------------------------------------------------------------------------------------------------------------------------------------------------------------------------------------------------------------------|-------------------------|--------------------------------------------------------------------------------------------------------------|----------------------------------------------------------------------------------------------------------|------------|
|                                 |                              |                                                         |                                                                                                                                                                                                                                                                                                                                                          |                         | social capital metrics                                                                                       |                                                                                                          |            |
| Ruiz-Padillo et al. (2018) [50] | Transport and urban planning | Influence of urban form on physical activity            | <p><b>Efficiency and comfort:</b> road connectivity; steepness of the street, sidewalk width; buildings quality (visual and aesthetic), street furniture quality and cleanliness; pavement materials</p> <p><b>Safety and security:</b> high vehicle traffic flow, crosswalks, assaults and thefts incidence; number of shops and services typology;</p> | <i>M</i>                | Neighbourhood audits, statistical data; demos;                                                               | City of Porto Alegre, Brazil,                                                                            | SP         |
| Saelens et al. (2003) [42]      | Public health                | Influence of urban form on physical activity            | <p><b>Attractiveness:</b> residential density; mixed land use;</p> <p><b>Efficiency and comfort:</b> street pattern and street connectivity; land use mix-access; sidewalks and pedestrian/bike trails;</p> <p><b>Safety and security:</b> traffic safety and crime safety;</p> <p><b>Pleasantness:</b> aesthetics;</p>                                  | <i>M; EJ</i>            | Measure of physical activity by accelerometer; survey with self-report measures of neighbourhood environment | San Diego, California; 107 adults of 2 neighbourhoods with high and low walkability; neighbourhood level | RB         |
| Schlossberg et al. (2007) [103] | Transport and urban planning | Relationship between urban form and pedestrian mobility | <p><b>Efficiency and comfort:</b> street network, road types (major, minor), impedance characteristics, street</p>                                                                                                                                                                                                                                       | <i>M</i>                | GIS dataset                                                                                                  | Oregon; 4 middle school areas and transit stop zones;                                                    | -          |

| References                   | Field Background                 | Main Theories and Methodologies that Guide the Paper                                                          | Walkable Factors (Efficiency and Comfort, Pleasantness, Safety, Attractiveness)                                                                                                                                                                                               | Type of Data: M; EJ; HS | Data and Covariables                              | Sample Social Group Profile scale                                          | Validation |
|------------------------------|----------------------------------|---------------------------------------------------------------------------------------------------------------|-------------------------------------------------------------------------------------------------------------------------------------------------------------------------------------------------------------------------------------------------------------------------------|-------------------------|---------------------------------------------------|----------------------------------------------------------------------------|------------|
|                              |                                  |                                                                                                               | connectivity, intersection density; pedestrian catchment area ratio;                                                                                                                                                                                                          |                         |                                                   | catchment area level (1.5 mi)                                              |            |
| Su et al. (2019) [68]        | Transport and urban planning     | Relationship between physical environment and walking behaviour                                               | <b>Efficiency and comfort:</b> street connectivity; sidewalk width, slope and curvature;<br><b>Attractiveness:</b> land use mix; destination density;<br><b>Pleasantness:</b> greenspace coverage and quality<br><b>Safety and Security:</b> perceived greenery and enclosure | M                       | Census, demos; geodatabase; camera signaling data | Hangzhou metropolitan area, China                                          | RB         |
| Sundquist et al. (2011) [46] | Urban planning and public health | Influence of urban form on physical activity; relationship between physical environment and walking behaviour | <b>Efficiency and comfort:</b> street connectivity;<br><b>Attractiveness:</b> land-use mix, residential density;                                                                                                                                                              | M; EJ                   | Census, demos; geodatabase; survey;               | 32 Stockholm; neighbourhood level                                          | RB         |
| Talen (2002) [37]            | Urban Planning                   | Relationship between physical environment and walking behaviour                                               | <b>Efficiency and comfort:</b> path distance and topography;<br><b>Safety and Security:</b> design speed of the route; design of the street;<br><b>Attractiveness:</b> presence; typology; quality                                                                            | M; EJ                   | Census data; demos                                | Portland; census block                                                     | -          |
| Van Dyck et al. (2011) [43]  | Public health                    | Influence of urban form on physical activity and on individual quality of life. <i>The "PLACE" theory</i>     | <b>Pleasantness:</b> scenery; neighbourhood satisfaction; urban texture; cleanliness/pollution; architectural and urban design; landscape design;                                                                                                                             | M; HS; EJ               | Questionnaire; planning data; demos               | Ghent (59 neighbourhoods); 3500 Belgian adults (20-65); statistical sector | RB         |

| References                  | Field Background                  | Main Theories and Methodologies that Guide the Paper | Walkable Factors (Efficiency and Comfort, Pleasantness, Safety, Attractiveness)                                                                                                                                                                                                                                                                                                                                                                                                                                   | Type of Data: M; EJ; HS | Data and Covariables                                                           | Sample Social Group Profile scale                                  | Validation |
|-----------------------------|-----------------------------------|------------------------------------------------------|-------------------------------------------------------------------------------------------------------------------------------------------------------------------------------------------------------------------------------------------------------------------------------------------------------------------------------------------------------------------------------------------------------------------------------------------------------------------------------------------------------------------|-------------------------|--------------------------------------------------------------------------------|--------------------------------------------------------------------|------------|
|                             |                                   |                                                      | <b>Security:</b> crime/police presence;<br><b>Attractiveness:</b> mix of activities, typology;<br><b>Comfort:</b> noise level                                                                                                                                                                                                                                                                                                                                                                                     |                         |                                                                                |                                                                    |            |
| Van Dyck et al. (2013) [44] | Public health                     | Influence of urban form on physical activity         | <b>Efficiency and comfort:</b> shelters and shade; cost; design of the street; design of the street (connectivity); signalisation;<br><b>Pleasantness:</b> scenery; architectural and urban design; cleanliness/pollution; urban texture;<br><b>Safety and security:</b> separation features; lighting; activities' atmosphere; volume/crowding if cars in the street; design of the street; crime/policy presence; urban texture;<br><b>Attractiveness:</b> residential density; mix of activities and typology; | <i>M; EJ</i>            | Statistical data; telephone and mail surveys; demos, social data               | Seattle, Baltimore<br>Adelaide, Ghent; adults; administrative unit | RB         |
| Walkonomics [97]            | Urban and transportation planning | Influence of urban form on travel behaviour          | <b>Attractiveness:</b> presence and number of activities;<br><b>Efficiency and comfort:</b> street width, physical barriers, provision and quality of pavement, presence of sidewalk; slope;<br><b>Safety and security:</b> lighting, vandalism, graffiti and presence of police; road accident statistics, street type, traffic speeds. <b>Pleasantness:</b>                                                                                                                                                     | <i>M; EJ</i>            | Geospatial open data and crowdsourced reviews from local residents and visitor | San Francisco, New York and England streets; street level          | SP         |

| References                      | Field Background                  | Main Theories and Methodologies that Guide the Paper | Walkable Factors (Efficiency and Comfort, Pleasantness, Safety, Attractiveness)                                                                                                                                                                                                                                                                                                                                                                                                                                                                                              | Type of Data: M; EJ; HS | Data and Covariables                                   | Sample Social Group Profile scale                                          | Validation |
|---------------------------------|-----------------------------------|------------------------------------------------------|------------------------------------------------------------------------------------------------------------------------------------------------------------------------------------------------------------------------------------------------------------------------------------------------------------------------------------------------------------------------------------------------------------------------------------------------------------------------------------------------------------------------------------------------------------------------------|-------------------------|--------------------------------------------------------|----------------------------------------------------------------------------|------------|
|                                 |                                   |                                                      | cleanliness, presence of trees or green vegetation, site atmosphere, aesthetic of places, architectural and landscape design, scenery, pedestrian activity;                                                                                                                                                                                                                                                                                                                                                                                                                  |                         |                                                        |                                                                            |            |
| Walkshed [98]                   | Urban and transportation planning | Influence of urban form on travel behaviour          | <b>Attractiveness:</b> presence and number of activities;<br><b>Efficiency and comfort:</b> impedance factors                                                                                                                                                                                                                                                                                                                                                                                                                                                                | <i>M</i>                | City governments, Bing, and InfoUSA, and NYC Data Mine | Philadelphia and New York; street level                                    | -          |
| Zuniga-Teran et al. (2017) [45] | Urban planning and public health  | Relationship between built environment and walking   | <b>Efficiency and comfort:</b> street grid; cul-de-sac; back alleys; street connectivity; alternative routes; fences; dwelling type unit; shade; hilly streets; services within 10 min walking distance<br><b>Safety, security and certainty:</b> sidewalks; bike lanes; mixed use; on-street parking; vegetated/dirt strip between sidewalk and carriageway; crosswalks and pedestrian signals; speed bumps; speed limit; dirt trails; streets lit at night; front porches; buildings close to the street; front garage doors; back alleys with garages; signage; landmarks | <i>M; EJ</i>            | Neighbourhood surveys                                  | Four neighbourhoods in Tucson, Arizona; 380 residents; neighbourhood level | SP, RB     |



| References | Field Background | Main Theories and Methodologies that Guide the Paper | Walkable Factors (Efficiency and Comfort, Pleasantness, Safety, Attractiveness)                                                                                                                                                                                                                                                                      | Type of Data: M; EJ; HS | Data and Covariables | Sample Social Group Profile scale | Validation |
|------------|------------------|------------------------------------------------------|------------------------------------------------------------------------------------------------------------------------------------------------------------------------------------------------------------------------------------------------------------------------------------------------------------------------------------------------------|-------------------------|----------------------|-----------------------------------|------------|
|            |                  |                                                      | <p><b>Attractiveness:</b> greenspace location; greenspace proximity to houses; community facilities proximity; density and diversity of activities and services</p> <p><b>Pleasantness:</b> graffiti, trash/litter, natural sights to look at; attractive buildings and homes; interactions with wildlife; slope; shade, trees along the streets</p> |                         |                      |                                   |            |

| LEGEND | Type of Data |              |                   | Validation          |                         |                         |
|--------|--------------|--------------|-------------------|---------------------|-------------------------|-------------------------|
|        | Measures (M) | Judgment (J) | Hedonic State (H) | Expert Opinion (EX) | Revealed Behaviors (RB) | Stated Preferences (SP) |

## References

99. Bias, T.K.; Leyden, K.M.; Abildso, C.G.; Reger-Nash, B.; Bauman, A.E. The importance of being parsimonious: Reliability of a brief community walkability assessment instrument. *Heal. Place* **2010**, *16*, 755–758.
100. Cerin, E.; Saelens, B.E.; Sallis, J.F.; Frank, L.D. Neighborhood environment walkability scale: Validity and development of a short form. *Med. Sci. Sports Exerc.* **2006**, *38*, 1682–1691.
101. Colclough, J.G. Modelling Pedestrian Accessibility Using GIS Techniques to Assess Development Sustainability. *Eur. Transp. Conf.* **2009**, 9 pp. Available online: <http://citeseerx.ist.psu.edu/viewdoc/download?doi=10.1.1.684.903&rep=rep1&type=pdf> (accessed on 27 May 2020).
102. Leslie, E.; Coffee, N.; Frank, L.D.; Owen, N.; Bauman, A.E.; Hugo, G. Walkability of local communities: Using geographic information systems to objectively assess relevant environmental attributes. *Heal. Place* **2007**, *13*, 111–122.
103. Schlossberg, M.; Agrawal, A.W.; Irvin, K. An Assessment of GIS-Enabled Walkability Audits. *J. Urban Reg. Inf. Syst. Assoc.* **2007**. Available online: [https://pages.uoregon.edu/schlossb/articles/schlossberg\\_GIS\\_audits.pdf](https://pages.uoregon.edu/schlossb/articles/schlossberg_GIS_audits.pdf) (accessed on 27 May 2020).
